# Supplementary material for: Cigarette company trade secrets are not secret: an analysis of reverse engineering reports in internal tobacco industry documents released as a result of litigation
Source: HighWire-hosted journal article supplement (doi:10.1136/tobaccocontrol-2014-051571), 2014-06-11
Supplement: tobaccocontrol-2014-051571supp_Suppl-E_1.xlsx [file tobaccocontrol-2014-051571supp_Suppl-E_1.xlsx]

## Sheet: Sheet1
Supplemental Excel File E-1. Reverse Engineering Reports (Velicer, Lempert & Glantz)
URL	Year	Context	Author(s)	Recipient(s)	Number of Brands Analyzed: Manufacturers (May include own companies Brands: Some historical Brands could not be determined)	Physical Parameters of Cigarette	Ash %	Average Weight or Cig Weight	Butt Length	Burning Rate	Cigarette Length	Circumference	Citrate	Dry Particulate Matter	Filling Capacity/Ratio/Power	Filter Type	Filter Efficiency	Filter Length	Filter Type	Filter Ventilation	Filter Weight	Firmness	Loose Ends	Moisture	Moisture Equilibrium	Oven Volatiles %	Paper Porosity	Paper Type	Permeability	Pressure Drop Filter/Tip	Pressure Drop of Cigarette/ Total Pressure Drop	Pressure Drop Tobacco Column	Puffs	Sieve Analysis	Strand Width	TEGD	Tipping Length	Tipping paper type	Tobacco Density	Tobacco Rod Length	Tobacco Rod Weight	Total Particulate matter	Type of Perforations	Ventilation %	Wet Particulate Matter	Width of Cut	Smoke Constituents	Acetaldehyde	Acetone
American Tobacco
http://legacy.library.ucsf.edu/tid/uwd34f00	1937	Document containing measurements of coumarin in competitor brands	N/A	N/A	4 Brands: PM, RJR
http://legacy.library.ucsf.edu/tid/rwh74f00	1967	Physical, chemical and smoke analysis of Marlboro 100	ES Harlow	JB McCarthy, RB Walker, RK Heimann, HG French	8 Brands: RJR, PM, Liggett		x	x		x	x	x		x		x		x	x					x			x			x	x		x				x								x
http://legacy.library.ucsf.edu/tid/lhs16j00	1969	Measurements of humectants, physical properties in two competitors brands	N/A	N/A	Kool 85, Kool 100																												x
http://legacy.library.ucsf.edu/tid/fru64f00	1969	Smoke analysis of competitors compared to American's brands	EC Cogbill	ES Harlow	5 Brands: PM, RJR																												x															x	x
http://legacy.library.ucsf.edu/tid/zdg12i00	1970	Summary of competitor analysis projects containing data on 11 brands including physical parameters, blend, chemical and smoke analysis	N/A	N/A	11 Brands: RJR, PM, BW		x	x		x	x	x	x		x	x		x	x			x		x	x		x			x	x		x	x			x	x	x							x		x
http://legacy.library.ucsf.edu/tid/lnb31a00 http://legacy.library.ucsf.edu/tid/mnb31a00	1983	Data tables with physical, blend and chemical data on 8 brands. Adjacent document indicates data is for products in French marketplace	RS Sprinkle III	D Bonnemaison, RP Truitt, EJ Balladur	6 Brands: RJR, PM		x	x		x	x	x						x				x		x			x			x	x	x		x			x		x		x		x	x
BAT and Brown and Williamson
http://legacy.library.ucsf.edu/tid/mve51f00	1969	Analysis of Winston cigarettes (RJR) smuggled into Venezuela	AR Cousins, DJ Wood	SJ Green	Winston (RJR)			x			x	x						x			x						x			x	x		x		x					x	x	x						x
http://legacy.library.ucsf.edu/tid/sod51f00	1987	Report analyzing differences in Marlboro's reconstituted tobacco in Germany and US	W Hass, V Heemann, HC Koene, U Kopke, E Kausch	U Herter, E Rittershaus, RG Nicholls, CJP de Siqueira, PJ Dunn, SR Massey, AL Heard, R Binns, L Reynolds	13 Brands: L&M, PM
http://legacy.library.ucsf.edu/tid/iey51f00	1991	Report containing physical, blend and smoke data for several competitor brands in 5 countries	RR Baker	IC Brown, PJ Dunn, E Grant, AL Heard, E Kausch, SR Massey, E Rittershaus, CJP de Siqueira, HV Thomsen, JS Wigand, TI Wilson, JA Luke	3 Brands: RJR, PM		x			x	x	x	x					x		x				x					x	x	x	x	x				x		x	x		x						x
http://legacy.library.ucsf.edu/tid/mxl82a99	1997	Data from smoke chemistry analysis of several competitor brands	WDE Irwin, AG Stephenson	N/A	10 Brands: RJR, PM, Dunhill																												x															x
http://legacy.library.ucsf.edu/tid/bgq14f00	1978	Analysis of theobromine and cocoa in competitor's brands	HW Maynor	AB Canon, M Frank, G Mullins, D Silberstein	8 Brands: RJR, Ligget, PM
http://legacy.library.ucsf.edu/tid/cej23f00	1983	Summary report on Marlboro KS with additional data on competitor brands	RR Johnson	JG Esterle, IW Hughes, JN Jewell, ML Reynolds, TF Riehl, RA Sanford	6 Brands: RJR, PM			x			x	x	x				x			x	x			x					x	x		x	x						x		x
http://legacy.library.ucsf.edu/tid/njz23f00	1984	Report with data on new blend PM was testing with consumer product group	RR Johnson	EE Kohnhorst, JN Jewell, KE Philpot, JF Nall, HC Woertz, RA Sanford, ML Reynolds, TF Riehl, RH Honeycutt, WO Crain, AJ Mellman, JG Esterle, JF Roberts, JH Lauterbach	1 PM trial blend			x			x	x						x		x	x						x		x	x	x	x	x				x		x		x
http://legacy.library.ucsf.edu/tid/ywv23f00	1984	Data on blends and blend chemistry from 25 brands	RR Johnson, ML Reynolds	EE Kohnhorst, CJ Dunn, RA Sanford, JN Jewell, M Hamerton, E Philpot, CG Lamb, LCF Blackman, AL Heard, MJ Hardwick, E Rittershaus, F Seehofer, PJ Dunn, RG Nicholls, CJP de Siqueira	25 Brands: PM, RJR, L&M (provides data on average by manufacturer)
http://legacy.library.ucsf.edu/tid/afk31f00	1984	Chemical analysis of 8 PM brands	CB Jenkins	EE Kohnhorst, ML Reynolds, KE Philpot, JH Lauterbach, TF Riehl, RR Johnson, RH Honeycutt	8 Brands: PM
http://legacy.library.ucsf.edu/tid/ypn86b00	1985	Physical, blend, and chemical analysis of 2 new PM products	RR Johnson	DA Beatty, RA Blott, LW Butler, JG Esterle,KA Flaherty, JN Jewell, EE Kohnhorst, EF Litzinger, JF Nall, ET Parrack, B Pellett, JP Pittman, RJ Pritchard, ML Reynolds, TF Riehl, TE Sandefur, CH Teague, TE Whitehair, J Alar, R Atwell	Dunhill Lights KS and 100's			x			x	x	x				x	x		x	x	x		x			x			x	x	x	x				x		x		x			x
http://legacy.library.ucsf.edu/tid/ejz23f00	1985	Physical, blend, and chemical analysis of 2 new PM products	RR Johnson	EE Kohnhorst, JN Jewell, ML Reynolds, TF Riehl, JH Lauterbach	Players Lights 25 KS and 100			x			x	x	x				x	x			x	x		x			x			x	x	x	x				x		x		x			x
http://legacy.library.ucsf.edu/tid/knm19j00	1985	Physical, blend and chemical analysis of 2 new PM products "aimed at the Hispanic market"	RR Johnson	J Alar, LW Butler, JN Jewell, J Sexstone, KA Flaherty,P Hudson,TE Whitehair, TE Sandefur, EE Kohnhorst, ML Reynolds, JF Nall, EF Litzinger, B Pellett, RA Blott, ET Parrack, JG Esterle, TF Riehl, DA Beatty	RIO KS and RIOs 100			x			x	x	x				x	x			x			x			x			x	x	x	x				x		x		x			x
http://legacy.library.ucsf.edu/tid/pzg23f00	1985	Physical, blend, and chemical analysis of 2 new PM products	R. R. Johnson	EE Kohnhorst, JN Jewell, ML Reynolds, TF Riehl, JH Lauterbach, JF Nall, DV Cantrell, A McMurtrie, RH Honeycutt	Concord KS, Concord KS Menthol			x			x	x	x				x	x			x	x		x			x			x	x	x	x				x		x		x			x
http://legacy.library.ucsf.edu/tid/zul23f00	1986	Summary of reverse engineering process, blend data on selected brands	RR Johnson, OC Lin	N/A	30 Brands: PM, RJR, Lorillard			x			x	x	x				x	x		x	x			x			x			x	x	x	x				x		x		x							x
http://legacy.library.ucsf.edu/tid/enr20f00	1986	Summary report with suggestions to make BW brands more like competitors. Physical, blend, and chemical analysis of competitors' brands	RR Johnson, OC Lin	EE Kohnhorst, AL Heard, R Binns, E Rittershaus, PM Denton, PJ Dunn, CJP de Siqueira, ML Reynolds, TF Riehl, RC Harris, JF Nall, A McMurtrie, DL Gordon	30 Brands: PM, RJR, Lorillard			x			x	x	x				x	x		x	x	x		x			x			x	x	x	x				x		x		x							x
http://legacy.library.ucsf.edu/tid/geu82a99	1987	Letter with chemical analysis of the burley and flue-cured tobacco in competitors' brands	RR Johnson	ML Reynolds, TF Riehl, WH Deines, CN Kounnas, JH Lauterbach, A McMurtrie, JF Nall, T Bobbitt	3 Brands: RJR, PM
http://legacy.library.ucsf.edu/tid/spa51f00	1987	Analysis comparing blends from RJR and PM brands	RR Johnson	ML Reynolds, TF Riehl, WH Deines, JH Lauterbach, A McMurtrie, JF Nall, T Bobbitt	4 Brands: PM, RJR
http://legacy.library.ucsf.edu/tid/oom20f00	1987	Report from meeting that contains ingredient data collected on Marlboro KS between 1976-1986	N/A	DL Gordon, DA Colby, RR Johnson, ED Alford, CN Kounnas, PJ Martinez, ML Reynolds, TF Riehl, JH Lauterbach, JF Nall, A McMurtrie, EF Litzinger, JL Ems, RH Marshall, WH Deines, KM Walker, LK Templeton, RA Gonterman, SC Moldoveanu, DS Roth, HC Woertz, RR Black, PR Fisher, DG Strubel, R Wilson, BB Chakraborty	Philip Morris KS
http://legacy.library.ucsf.edu/tid/wpa51f00	1987	Report with blend, chemical and additive analysis of a reformulated Marlboro Menthol KS brand	RR Johnson	TE Whitehair, TF Riehl, GD Raphael, JL Ems, JN Jewell, ID Macdonald, RT Lewis, J Curtis, ML Reynolds, BL McCafferty, JF Nall	Reformulated Marlboro Menthol KS			x			x	x	x				x			x	x	x		x			x			x	x	x	x				x		x		x
http://legacy.library.ucsf.edu/tid/xqu31f00	1988	Analysis of cocoa and licorice levels of Marlboro KS reconstituted tobacco	ED Alford	ML Reynolds, TF Riehl, A McMurtrie, JL Barnett, JG Esterle, JH Lauterbach, DA Colby, BB Chakraborty, RA Gonterman, SC Moldoveanu, M A Kamer, WR Conway, TE Bobbit	Marlboro KS
http://legacy.library.ucsf.edu/tid/lvs20f00/	1989	Summary of "Project ADVERB", extended analysis of Marlboro KS with annual data for ingredients between 1976-1989	JH Lauterbach, RR Johnson	N/A	Marlboro KS
http://legacy.library.ucsf.edu/tid/hus20f00	1992	Report on Marlboro's blend chemistry and additives in 8 countries	DL Gordon	L Saboia, CJP de Siqueira, LT Caruso, GA Read, R Crellin, E Rittershaus, E Kausch, EE Kohnhorst, JS Wigand, TF Riehl	Marlboro KS							x	x				x			x		x		x			x			x	x	x	x						x					x				x
http://legacy.library.ucsf.edu/tid/iss46b00	1992	Blend, chemical and smoke analysis primarily focused on Marlboro brands	D Gordon,N Kulshreshtha, S Moldoveanu	J Wigand, A Golub, P Harper, K Walker, T Riehl, B Chakraborty, J Lauterbach, E Litzinger, A McMurtrie, D Cantrell, R Black, R Gonterman, L Caruso, D Scholten, R Denier, P Martinez	9 Brands: PM, RJR
http://legacy.library.ucsf.edu/tid/kji93f00	1992	Report with data comparing PM and RJR products sold in Russia to the United States	N Kulshreshtha, S Moldoveanu	T Riehl, A McMurtrie, J Lauterbach, P Martinez, B Chakraborty, R Denier, D Scholten, D Frank, R Black, D Gordon, K Walker, R Gonterman, W Conway, J Tang, P Lewis	Marlboro KS and Winston (RJR)
http://legacy.library.ucsf.edu/tid/yfd33f00	1993	Blend, chemical and additive analysis of PM and RJR Products	N Kulshreshtha, S Moldoveanu	T Riehl, A McMurtrie, R Black, J Lauterbach, D Gordon, S Magenheimer, B Chakraborty, R Gonterman, D Scholten, K Walker	4 Brands: RJR, PM																																							x
http://legacy.library.ucsf.edu/tid/xgk46b00	1993	Provides physical and ingredient data on 140 brands from variety of competitors.	T Burch	N/A	140 Brands: American, L&M, Lorillard, RJR, PM			x			x	x	x			x	x		x	x	x	x		x					x	x	x	x	x				x		x		x
http://legacy.library.ucsf.edu/tid/rnr5xf00	1994	Report analyzing ingredients and blends in competitors' value brands to identify how costs were lowered	N Kulshreshtha, Q Zha, DM Palazzolo, S Moldoveanu	T Riehl, A McMurtrie, R Black, D Gordon, B Chakraborty, R Gonterman, D Scholten,R Honeycutt, J Lauterbach, K Walker, W Cowart, A Golub	15 Brands: American, PM, Lorillard,						x													x															x		x
http://legacy.library.ucsf.edu/tid/ydc20j00	1995	Chemical analysis of international and domestic versions of Parliament Lts 100 (PM)	N Kulshreshtha, Q Zha	B Chakraborty, S Moldoveanu, B Price	Parliament Lts 100
http://legacy.library.ucsf.edu/tid/svux9j00	1997	Report comparing ingredients in Marlboro Lights from Eastern Europe and the US	N. P. Kulshreshtha, Q. Zha, S. C. Moldoveanu	T Riehl, S Appleton, R Black, B Chakraborty, A Golub, M Haman, R Honeycutt, A McMurtrie, R Mulholland, B Price, C Taylor	Marlboro Light			x			x	x	x				x	x		x	x	x		x					x	x	x	x					x			x	x
Liggett & Myers (Liggett)
http://legacy.library.ucsf.edu/tid/fzu37a00	1974	Data on coumarin amounts in competitors' brands	GF Hunt, WW Bates	T Cramer, Slat, Rechholtz, Knopf, Chmiel, Seidensticker, Kersey, Greer, Mold	8 Brands :Benson and Hedges, Lorillard, American, RJR, BW
http://legacy.library.ucsf.edu/tid/ayz57a00	1975	Summary report of blend, smoke and physical analysis of Marlboro Light F85	JR Newsome	N/A	Marlboro Light F85						x	x			x	x			x		x				x		x			x			x				x				x
http://legacy.library.ucsf.edu/tid/oum37a00	1982	Physical and chemical analysis of 46 competitor brands	E Atkins, J Bullock, E Kennedy, F Shankle	N/A	46 Brands: American, BW, Lorillard, PM, RJR			x		x	x	x						x		x	x						x			x	x		x				x							x
http://legacy.library.ucsf.edu/tid/nau47a00	1991	Meeting minutes that contain an attachment with TSNA's for competitors' brands	D Dietz	D Sulin	11 Brands: BW, American, RJR, Marlboro			x
http://legacy.library.ucsf.edu/tid/gkt47a00	1991	Meeting minutes discussing several projects, contains data on humectants in competitors' products	D Dietz	D Sulin	20 Brands: PM, RJR
Lorillard
http://legacy.library.ucsf.edu/tid/ecg51e00	1975	Physical, blend and smoke analysis of Marlboro Lights Menthol Filter cigarettes	J Morgan	A Spears, C Welborn, F Schultz, R Wagner, S Jones, H Pearman, Jr., B Ave, A Hudson	Marlboro Menthol Light Filter		x	x			x	x		x		x		x	x		x			x			x	x		x	x							x								x
http://legacy.library.ucsf.edu/tid/agw88c00	1976	Semi-annual chemical analysis of competitors' brands	H Bogue	F Schultz, R Smith, D Tedder, A Spears, S Jones, A Hudson, C Lewis R Forrest, M Ireland	62 Brands: PM, RJR, L&M, BW, American		x
http://legacy.library.ucsf.edu/tid/ohk54c00	1984	Memo containing amount of menthol in competitor brands	S Sharpe	H Bogue, V Norman, H Pearman, Jr., O Manduley	32 Brands: RJR, BW, PM
http://legacy.library.ucsf.edu/tid/yan40e00	1984	Report with theobromine measurements from competitors' brands	F Perini	J Bell, A Hudson, T Jessup, H Minnemeyer, F Schultz, J Smith, C Tucker	26 Brands: RJR, L&M, PM, BW
http://legacy.library.ucsf.edu/tid/ytn34c00	1985	Analysis of inorganic compounds using x-ray fluorescence technology on competitors' brands	M Sudholt	W Deaton, M Ireland, H Minnemeyer	14 Brands: PM, BW, L&M, RJR		x
http://legacy.library.ucsf.edu/tid/zyo80e00	1989	Memo with data on new Marlboro product	M Cohn	D Spears	Marlboro Ultra Light 100		x	x			x	x	x			x	x	x	x		x	x		x						x			x				x		x		x			x
http://legacy.library.ucsf.edu/tid/ovv57h00	1996	Analysis of ingredients in Winston 100% 'No Additive' brand cigarettes	B Craven, J Johnson, F Perini, R Stepnowski, R Striegel, R Walker	M Sudholt	Winston No Additive		x
http://legacy.library.ucsf.edu/tid/wrc67h00	1997	Memo with data on Eclipse product	T Larsen	M Sudholt, R Patterson	4 Brands: RJR																																											x
http://legacy.library.ucsf.edu/tid/jkz68c00	1998	Physical, smoke and chemical analysis of competitor brands	R Patterson	S Jones, W Barnes, K Barrett, R Bondurant, E Butler, B Craven, W Flory, V Garrard, K Harper, T Jessup, J Johnson, T Larson, K Mills, E Mabe, T Skinner, R Walker, D Williams	33 Brands :RJR, PM, BW		x	x			x	x					x				x									x	x		x				x				x
RJ Reynolds
http://legacy.library.ucsf.edu/tid/ymo59d00	1962	Analysis of carbohydrates in competitive cigarettes with a focus on fructose	JD Shiffert	K Hoover, E Harwood, M Senkus, E Nielson	24 Brands American, BW, L&M, Lorillard, PM
http://legacy.library.ucsf.edu/tid/dzc78d00	1962	Monthly research report that contains smoke, blend and physical analysis of 10 competitor brands	M Senkus	K Hoover, S Hanes, Jr., C Stokes	10 Brands: American, BW, L&M, Lorillard, PM			x		x								x									x
http://legacy.library.ucsf.edu/tid/jdt65d00	1972	Memo with analysis of Marlboro Menthol tobacco blend and expanded tobacco	A Rodgman	M Senkus, C Teague, Jr., A Laurene, J Fredrickson, J Clingman	Marlboro Menthol			x		x	x	x												x									x		x					x	x				x			x
http://legacy.library.ucsf.edu/tid/inz65d00	1972	Report on project to create a cigarette that tested similar to Marlboro KS after conducting physical, chemical and blend analysis.	L Cook	DP Johnson, S Jones, R Cundiff, A Sensabaugh, Jr., J Wilson	Marlboro KS
http://legacy.library.ucsf.edu/tid/sxi59d00	1977	Report with vapor phase analysis of several RJR and PM brands	M Newell, C Miller, N Sanders	A Laurene, M Senkus, A Rodgman, H Bluhm, R Cundiff, D Piehl, J Schumacher, J Giles, W Clapp, J Clingman, C Mansfield, J Dobbins, M Stowe, W Henley, C Green	5 Brands: PM		x			x				x										x									x												x			x	x
http://legacy.library.ucsf.edu/tid/fdu79d00	1977	Analysis of humectants in 64 brands	A Rodgman	A Johnston, M Cohn, Jr., C Fitzgerald, Jr., A Laurene, R Cundiff	64 Brands: PM, BW, Lorillard
http://legacy.library.ucsf.edu/tid/sww76a00	1977	Physical, chemical and blend analysis of Marlboro 100's	R Sells	J Woods, A Laurene, R Cundiff, T Eskew, D Johnson	Marlboro 100			x		x	x					x		x	x		x	x		x			x						x				x			x	x				x			x
http://legacy.library.ucsf.edu/tid/fiw69d00	1978	Report with physical, chemical and blend analysis of competitor brands.	M Shannon	A Laurene, M Senkus, A Rodgman, H Bluhm, R Cundiff, D Piehl, W Henley, J Giles, W Clapp, C Mansfield, J Clingman, J Dobbins, M Stowe, J Schumacher, M Shannon	15 Brands: PM, BW, Lorillard		x	x	x					x	x	x			x		x	x		x			x						x			x					x				x			x
http://legacy.library.ucsf.edu/tid/kcr33a00	1978	Analysis of the reconstituted tobacco in Marlboro	J Dickerson	J Woods, D Piehl, W Henley	Marlboro
http://legacy.library.ucsf.edu/tid/rjl61c00	1978	Data tables with humectant levels of competitor brands	A Rodgman	A Johnston, A Laurene, R Cundiff, M Crohn, Jr., C Fitzgerald, Jr., S Clark, D Piehl	70 Brands: American, BW, L&M, Lorillard, PM
http://legacy.library.ucsf.edu/tid/lwj92i00	1979	Report with blend and chemical analysis of Marlboro blend, comparison to Winston (RJR)	W Casey, T Perfetti	N/A	Marlboro					x
http://legacy.library.ucsf.edu/tid/wkd78d00	1979	Quarterly research summary that includes analysis of Marlboros from different cities and years	W Henley	D Piehl	2 Brands: PM			x	x			x		x								x		x							x		x								x				x			x
http://legacy.library.ucsf.edu/tid/efd68d00	1983	Data table with coumarin levels of competitors' products	E Bernasek	G Di Marco, D Piehl, J Phillips, D Roberts	20 Brands: American, BW, smaller companies
http://legacy.library.ucsf.edu/tid/iou35d00	1983	Physical, blend and chemical data on Marlboro 85 at 5 time points between 1980-81	N/A	N/A	Marlboro 85		x	x	x	x	x			x	x	x		x	x			x	x	x			x						x	x		x	x		x		x			x	x			x
http://legacy.library.ucsf.edu/tid/mvg92i00	1984	Data tables with blend, physical and smoke analysis of 2 types of Marlboro KS	N/A	N/A	Marlboro 25 KS and Marlboro 20 KS				x									x			x	x		x									x				x				x	x
http://legacy.library.ucsf.edu/tid/ysn75a00	1989	Casings analysis comparing Marlboro to Winston (RJR)	G Wallace	L Inman, B Lawrence	Marlboro 85
http://legacy.library.ucsf.edu/tid/iaz23d00	1990	Report containing physical, smoke and tobacco analysis of intercepted Marlboro product	A Ludolf	JM Piscitelli, J. Robertson, G Dimarco, R Lloyd, M Dryden, H. Guess, L. Inman, D Potter, K Vuksan, C Eskridge, G Myers	Marlboro Medium and Extra Lights			x	x		x										x	x		x									x				x			x		x		x
http://legacy.library.ucsf.edu/tid/klj33a00	1990	Physical, chemical and smoke analysis of two competitor products sold in Saudi Arabia	AF Miller Jr.	M Gnatkowski, S Saad	Merit (PM) and Barclay (BW)			x	x		x		x		x			x			x	x	x	x									x	x			x			x	x	x		x
http://legacy.library.ucsf.edu/tid/yse38c00	1991	Data from 6 monthly physical and chemical analysis of RJR and competitor products	N/A	D Beeson, F Best, L Curtis, MJ Dryden, H Ebert, J Fogle, J Fulp, C Henderson, D Hildreth, J Inman, S Kelly, S Lane, S Larsen, B Lawrence, F Lockamy, A Ludolf, B Luffman, C Manning, C Marritt, T Martin, J McKenzie, D Mitchell, J Morgan, D Nanney, C Norman, S Norman, T Perfetti, W Peterson, P Phillips, T Porter, D Potter, J Reece, J Ring, A Scism, G Shouse, L Sides, S Snyder, M Stove, M Swaim, S Ti…	12 Brands: Lorillard, PM			x			x		x		x			x				x		x									x				x			x	x	x		x
http://legacy.library.ucsf.edu/tid/rrw75a00	1991	Memo containing nitrate analysis of Marlboro 85 and Winston (RJR)	A Ludolf	R Willard, J Inman	Marlboro 85
http://legacy.library.ucsf.edu/tid/btn75a00	1993	Data Table with physical, smoke, and chemical comparison of Marlboro KS and Winston (RJR)	P Woods	W Luffman, L Inman, H Guess, P Phillips, D Potter, M Stevenson	Marlboro KS			x	x		x				x						x	x		x									x				x			x	x	x		x
http://legacy.library.ucsf.edu/tid/jtc43d00	1993	Tables containing the tobacco specific nitrosamines competitors' brands	N/A	N/A	14 Brands: BW, Lorillard, PM
http://legacy.library.ucsf.edu/tid/qjs33d00	1993	Summary report of blend analysis on competitor brands	P Woods	L Inman, W Cook, D Potter, M Stevenson, H Guess, P Phillips, K Sanders, C Davis	14:American, BW, L&M, Lorillard, PM
http://legacy.library.ucsf.edu/tid/vgn33d00	1994	Report containing physical, chemical and blend analysis of competitor brands	C Davis, D McHone, D Myers, C Norman, R White	R Cook, L Curtis, C Davis, S Jakob, S Kelly, R McHone, D Myers, C Norman, P Phillips, D Potter, M Stevenson, B White, C Blixt, A Borschke, G Burger, W Dahne, C Ehmann, B Hardin, C Tinsley, J Wheeler, R Willard	14 Brands: American, PM			x			x	x			x						x	x		x									x								x	x		x
http://legacy.library.ucsf.edu/tid/nkb09j00	1994	Physical and chemical analysis of intercepted test product believed to be from PM	D Roberts	L Sasso, R Cook, D Potter	1 Brand: Unknown																												x									x
http://legacy.library.ucsf.edu/tid/fuc41d00	1995	Formaldehyde and ammonia levels of competitor brands	J Wilson	S Tinsley, Dr. Ehmann	32 Brands: PM
http://legacy.library.ucsf.edu/tid/pye01d00	1995	Physical, smoke and chemical comparisons for Winston and Marlboro	N/A	N/A	Marlboro 85			x			x				x			x			x	x		x									x				x			x	x	x		x
http://legacy.library.ucsf.edu/tid/tnk90d00	1995	Physical, chemical, smoke and blend analysis of Kool brand (BW) to detect changes over time	J Roberts	P Phillips, L Brown	2 Brands :BW			x							x						x	x				x							x								x	x
http://legacy.library.ucsf.edu/tid/qye01d00	1995	Physical, chemical, smoke and blend analysis of Benson and Hedges (PM) to detect changes over time	N/A	N/A	Benson and Hedges Light 100 Menthol			x			x		x		x			x				x		x									x				x			x	x	x		x
http://legacy.library.ucsf.edu/tid/ryc41d00	1996	Data table with amount of urea in competitor brands	N/A	N/A	40 Brands: PM, Lorillard, RJR
http://legacy.library.ucsf.edu/tid/ooc15a00	1996	Data tables containing physical, smoke and chemical analysis of competitor brands for 4th quarter, 1995	R White	L Curtis, MJ Dryden, A Phillips, P Phillips, D Potter, B Redd, T Young, W Cook, M Stevenson, S Armstrong, M Dehart, T Hickman, J Inman, S Lane, T Martin, D Wilhelm	16:BW, Lorillard, PM			x			x							x			x	x		x									x				x			x	x	x		x
http://legacy.library.ucsf.edu/tid/mqy36a00	1997	Data tables with physical, blend and chemical analysis of competitor brands	D Petticord	S Albright	17: BW, Lorillard, PM			x			x				x			x			x	x		x									x				x			x	x	x		x
Philip Morris
http://legacy.library.ucsf.edu/tid/phw67e00	1965	Memo with amount of coumarin in competitors' brands	F Resnik	H Wakeham	19 Brands: American, BW, L&M, Lorillard, RJR
http://legacy.library.ucsf.edu/tid/bwe93e00	1965	Amount of acrolein in competitors' brands	R Ikeda	F Resnik, J Wickham, C Badgett, D Watson	12 Brands: American, L&M, RJR
http://legacy.library.ucsf.edu/tid/vbk36e00	1969	Report with table containing gas phase analysis of competitor brands	F Green, A Palmer, R Ikeda	T Laszlo, H Wakeham, R Seligman, T Osdene, R Ikeda, P Eichorn, H Merritt, R Thomson, D Lowitz, A Palmer, F Will, J Wickham, D Watson, J Charles	18 Brands: American, L&M, Lorillard, RJR																																											x	x
http://legacy.library.ucsf.edu/tid/uyx97e00	1972	Report containing sugar analysis of competitors' brands	E Oakley, A Palmer, F Will, III	T Osdene, R Thomson, F Daylor, L Meyer, W Gannon, J Osmalov, H Spielberg, D Watson, E Bourlas, W Harvey	12 Brands: American, BW, L&M, Lorillard, RJR
http://legacy.library.ucsf.edu/tid/ndf97e00	1976	Data table containing results from smoke analysis of competitor brands	R Fenner	J Wickham, R Seligman, F Resnik, R Thomson, W Gannon, T Osdene, L Meyer	25: American, BW, L&M, Lorillard, RJR
http://legacy.library.ucsf.edu/tid/xsu74e00	1983	Study on ammonia optimization that contains chemical analysis of competitor brands	K Parrish, H Spielberg, F Daylor	M Hausermann, W Farone, L Meyer, T Osdene, R Thomson, L Turano, K Burns, J Charles, P Gauvin, A Kassman, D Knudson, B Kosakowski, W Kuhn P Martin, W Mutter, E Sanders, F Watson, R Waugh, J Whidby, J Wickham W Claflin, W Dunn, Jr., R Fagan, R Ikeda, A Lilly, H Merritt, R Carpenter, E Fischer, R Jenkins, A Kallianos, G Keritsis, M Manzelli, R Heretick, J Crichton, R Seligman, F Resnik, C Levy, T Go…	5 Brands: RJR															x						x							x								x			x
http://legacy.library.ucsf.edu/tid/wjr60c00	1985	Cigarette Information Report containing physical, smoke and blend data for competitors' brands	F Senehi	P Barbezat, B Berg, D Berthet, G Bible, E De Borst, A Buzzi, L Camilleri, H Cullman, S Darrah, P Denis, G Diserens, K Ferguson, D Gatland, L Greher, W Grunbaum, M Hansen, O Harmsma, M Hausermann, G Haussler, J Hogan, M Horst, E Houghton, N Janelle, G Karandjoulis, F Looije, F Lowman, T Macleod, T Martin, H Maxwell, R Murray, S Nelson, D Polack, F Resnik, J Robinson, C Salguero, H Schedel, H Schil…	Over 300 Brands			x			x	x		x		x	x	x	x		x	x				x	x						x				x	x	x		x		x	x	x
http://legacy.library.ucsf.edu/tid/cho06c00	1986	Chemical analysis of brands from the Japanese market	B Handy	C Bright, O Harmsma, J Charles, R Cox, R Heretick, K Houghton, P O'Brien, D Rockwell, H Spielberg	12:BW, L&M, RJR
http://legacy.library.ucsf.edu/tid/qso26e00	1987	Chemical analysis of reconstituted tobacco from competitor's brands	R Uhl	H Alonso	Unknown, presented by average per company
http://legacy.library.ucsf.edu/tid/wpn62e00	1988	Cigarette Information Report containing physical, smoke and blend data for competitors' brands	B Mait, J Wickham	G Bible, M Bring, H Cullman, J Cullman, III, H Maxwell, R Millhiser, J Murphy, R Murray, F Resnik, M Serrano, G Weissman, M Bourlas, A Britton, V Buccellato, J Campbell, W Campbell, J Charles, D Dangoor, D Devitre, O Dudley, III, J Gibson, M Goldberg, C Horner, K Houghton, D Knudson, W Kuhn, J Myracle, T Osdene, L Pollak, C Salguero, H Steele, W Thoma, W Webb, J Zoler	117 Brands: American, BW, Lorillard, L&M, RJR				x	x	x	x				x	x	x	x		x						x	x					x			x	x		x		x	x		x
http://legacy.library.ucsf.edu/tid/tpn62e00	1989	Cigarette Information Report containing physical, smoke and blend data for competitors' brands	S Laffoon, B Mait , J Wickham	G Bible, M Bring, H Cullman, J Cullman, III, H Maxwell, R Millhiser, J Murphy, R Murray, F Resnik, M Serrano, G Weissman, M Bourlas, A Britton, V Buccellato, J Campbell, W Campbell, J Charles, D Dangoor, D Devitre, O Dudley, III, J Gibson, M Goldberg, C Horner, K Houghton, D Knudson, W Kuhn, J Myracle, T Osdene, L Pollak, C Salguero, H Steele, W Thoma, W Webb, J Zoler	Over 100 Brands: American, BW, Lorillard, L&M, RJR				x	x	x	x				x	x	x	x		x						x	x	x				x				x		x		x	x		x
http://legacy.library.ucsf.edu/tid/ejs60c00	1989	Physical, smoke and blend analysis of international competitors' products	L Fernandez	N/A	Primary focus on Barclay Brand			x	x		x	x		x		x			x		x					x	x	x					x				x		x		x		x	x		x
http://legacy.library.ucsf.edu/tid/rzi09e00	1990	Presentation on ultra-light brands contains smoke and chemical data on competitor brands	N/A	N/A	4 Brands: RJR						x	x																					x				x							x
http://legacy.library.ucsf.edu/tid/bjs60c00	1991	Cigarette Information Report containing physical, smoke and blend data for competitors' brands in 46 countries	F Senehi	B Berg, G Bible, J Boder, E De Borst, M Bourlas, A Buzzi, L Camilleri, H Cullman, S Darrah, L Dediot, P Denis, G Diserens, G Durner, B Fenner, K Ferguson, H Gaisch, A Gembler, H Goldberg, L Greher, M Hansen, K Heidsieck, P Herzog, J Hogan, K Houghton, N Janelle, G Karandjoulis, J Kramer, S Krausse, R Lively, F Lowman, D Maeder, H Maxwell, D Milby, M Miles, R Murray, G Nassif, J Nienow, L Peuckert…	Over 100 Brands			x			x	x		x		x	x		x		x	x				x							x				x							x	x
http://legacy.library.ucsf.edu/tid/laq83e00	1991	Physical, smoke and blend comparison of new competitor products	K Mitchell	R Fenner, H Burnley, W Campbell, J Charles, D Cox, D Dangoor, S Darrah, C Ellis, R Heretick, K Houghton, W Kuhn, C Levy, C Lilly, J Myracle, B Reuter, M Serrano, H Spielberg, M Suter	8:Lorillard, RJR				x	x	x	x				x	x	x	x	x	x							x	x				x				x		x		x	x		x
http://legacy.library.ucsf.edu/tid/bpl19h00	1994	Memo containing data on tobacco blend changes in competitor brands	M Buchanan	C Cohen	4:RJR
http://legacy.library.ucsf.edu/tid/swn49c00	1997	Chart with physical measurements and ingredient information on Winston products	L Chambers, Hughes	N/A	3 Brands: RJR			x	x	x	x	x	x			x		x	x		x	x	x			x	x		x				x				x		x	x	x	x		x
http://legacy.library.ucsf.edu/tid/tbg67d00	1998	Report on formaldehyde containing measurements from competitor brands	M Parrish, J Lewis	C Ellis, J Lyons-Hart, F Hsu, K Koller, C Lilly, J Piade, S Plunkett, K Shafer, R Solana, S Wrenn, S Yang	11 Brands: RJR
http://legacy.library.ucsf.edu/tid/rtn10i00	2001	Physical, smoke, blend and humectant analysis of new RJR Products	R Holleman	H Alonso, R Anise, M Arwady, M Barrington, D Beran, N Brennan Lund, H Burnley, M Chemla, N Conrad, M Counts, G Cummings, D Dangoor, R Fenner, T Garguilo, C Hatcher, T Helm, M King, A Kottsieper, S LeVan, J Lewis, C Lilly, A Lopez, M Mahan, D Milby, M Mobrem, K Monahan, L Nardell, B Neidle, J Nelson, K Newman, U Nyffeler, L Peuckert, K Podraza, L Pulsifer, S Roberts, S Rivera, J Smith, A Snyder, R…	5 Brands: RJR				x	x	x	x	x			x	x	x	x		x	x				x		x	x				x				x		x	x	x			x				x
Row 8 and 9 are counted as reverse engineering report, with tables spread across two tobacco documents					*Total number includes total Brands analyzed including own and competitors
[truncated: 101 more columns]
